# Supplementary material
Source: Springer Nature journal article supplement (https://www.springermedizin.de/resource/supplementary/12963_2010_112_MOESM3_ESM.pdf/9572682)

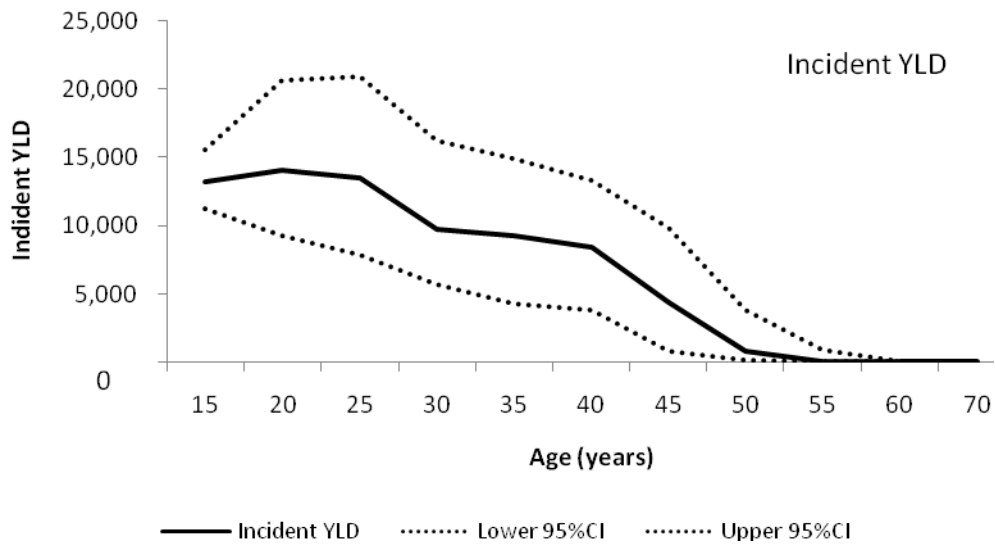

— Incident YLD    ..... Lower 95%CI    ..... Upper 95%CI

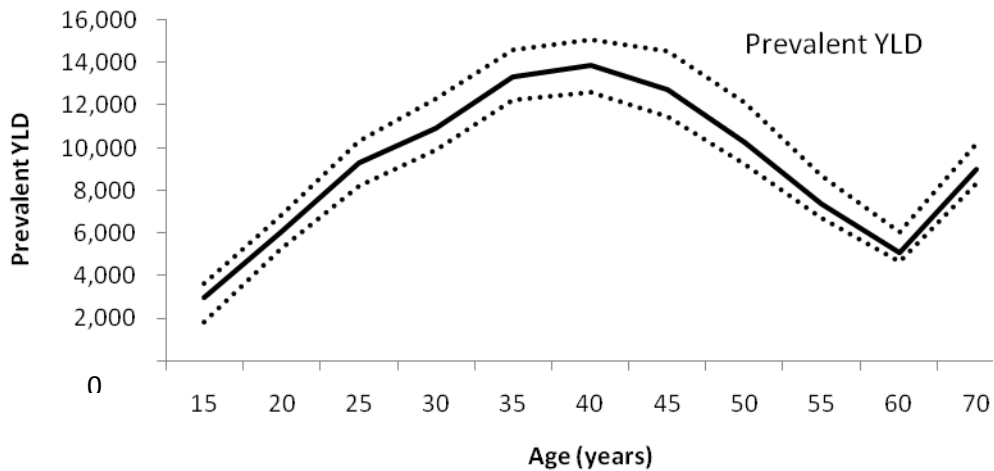

— Prevalent YLD    ..... Lower 95%CI    ..... Upper 95%CI

Supplement: MOESM3 [file 9572682]
